# Supplementary material for: Genomic Heritability and Genome-Wide Association Studies of Plasma Metabolites in Crossbred Beef Cattle
Source: Front Genet. 2020 Sep 24;11:538600. doi: 10.3389/fgene.2020.538600 (PMC7542097; doi:10.3389/fgene.2020.538600)
Supplement: Supplementary file 2 [file Table_2.XLSX]

## Sheet: Sheet1
Table S2. Significant biological functions and their p-values for heritable metabolites: category of biological functions, p-value of functions and molecules that involoved in the biological functions.
Trait	Category	p-value	Molecules
Betaine	Cell-To-Cell Signaling and Interaction	1.06E-08-4.27E-03	ASPA,betaine,CREB1,EZR,FZD5,IGF2R,IL1A,IL1B,IL1F10,IL1RN,IL36A,IL36G,IL36RN,IL37,PLG,PRKDC,SLC22A1,SLC22A2,SLC22A3
	Molecular Transport	1.06E-08-4.17E-03	ASPA,betaine,CREB1,EZR,IGF2R,IL1A,IL1B,IL1RN,IL37,PLG,SLC22A1,SLC22A2,SLC22A3
	Small Molecule Biochemistry	1.06E-08-4.27E-03	ASPA,betaine,CREB1,IGF2R,IL1A,IL1B,IL1RN,IL37,PLG,PRKDC,SLC22A1,SLC22A2,SLC22A3
	Organismal Injury and Abnormalities	2.65E-08-4.27E-03	ASPA,betaine,CCNYL1,CKAP2L,CREB1,CRYGB,CRYGC,EZR,FZD5,HDAC10,IGF2R,IL1A,IL1B,IL1F10,IL1RN,IL36A,IL36G,IL36RN,IL37,OR1G1,PLEKHM3,PLG,PRKDC,RAP1GAP2,SLC22A1,SLC22A2,SLC22A3,SPATA22,SPIDR,SYTL3,TBC1D22A,TUBGCP6,UBE2V2
	Lipid Metabolism	2.21E-07-4.17E-03	ASPA,betaine,CREB1,IGF2R,IL1A,IL1B,IL1RN,IL37,PLG,PRKDC,SLC22A1,SLC22A2
	Carbohydrate Metabolism	1.78E-06-3.65E-03	betaine,CREB1,IL1A,IL1B,IL1RN,IL37,SLC22A1
	Gastrointestinal Disease	5.92E-06-4.26E-03	betaine,CKAP2L,CREB1,IL1A,IL1B,IL1RN,IL36G,IL37,PLG,PRKDC
	Amino Acid Metabolism	6.44E-06-3.43E-03	betaine,CREB1,IL1A,IL1B,IL1RN,IL37
	Cell Death and Survival	8.4E-06-4.26E-03	ASPA,betaine,CREB1,EZR,IGF2R,IL1A,IL1B,IL1RN,IL37,PLG,PRKDC,SLC22A1,SLC22A2,SLC22A3,SPIDR,TUBGCP6
	Cardiovascular Disease	1.97E-05-4.1E-03	betaine,CREB1,IGF2R,IL1A,IL1B,IL1RN,PLG
	Metabolic Disease	8.82E-05-2.85E-03	ASPA,betaine,CREB1,IL1A,IL1B,IL1RN,PLG
	Hepatic System Disease	4.33E-04-4.26E-03	betaine,CREB1,IL1A,IL1B,IL1RN,PLG
	Endocrine System Disorders	1.13E-03-2.5E-03	betaine,CREB1,IL1A,IL1B,IL1RN
	Free Radical Scavenging	2.32E-03-2.32E-03	betaine,IL1A
Choline	Neurological Disease	1.49E-06-2.26E-02	CACNA1A,CACNG4,choline,GAL,IER2,KMT5B,NACC1,NDUFS8,NFIX,PPP3CA,SYNJ1,TNFSF11,UNC93B1
	Tissue Morphology	7.07E-05-2.26E-02	CACNA1A,choline,GAL,LYL1,NFIX,PPP3CA,TCIRG1,TNFSF11,UNC93B1
	Connective Tissue Disorders	8.82E-05-2.16E-02	CACNA1A,CACNG1,choline,INSIG2,LYL1,NACC1,NFIX,PPP3CA,TCIRG1,TNFSF11,UNC93B1
	Skeletal and Muscular Disorders	8.82E-05-2.26E-02	CACNA1A,CACNG1,choline,GAL,HELZ,INSIG2,NACC1,NDUFS8,NFIX,PPP3CA,SYNJ1,TCIRG1,TMPRSS15,TNFSF11
	Cellular Development	1.08E-04-2.12E-02	CACNA1A,CHKA,KMT5B,LYL1,NACC1,NFIX,PPP3CA,TCIRG1,TNFSF11,UNC93B1
	Cellular Growth and Proliferation	1.08E-04-2.12E-02	CACNA1A,CHKA,GAL,KMT5B,LYL1,NACC1,NFIX,PPP3CA,TCIRG1,TNFSF11,UNC93B1
	Tissue Development	1.08E-04-2.17E-02	CACNA1A,CHKA,choline,INSIG2,LYL1,NACC1,NFIX,PPP3CA,TCIRG1,TNFSF11
	Nervous System Development and Function	1.88E-04-2.26E-02	CACNA1A,CACNG4,CHKA,choline,EVA1C,GAL,NACC1,NFIX,PPP3CA,SYNJ1,TCIRG1,TNFSF11
	Organismal Development	1.88E-04-2.25E-02	CACNA1A,choline,GAL,INSIG2,KMT5B,LYL1,NACC1,NFIX,PPP3CA,TCIRG1,TMPRSS15,TNFSF11,UNC93B1
	Gastrointestinal Disease	6.17E-04-1.84E-02	CACNA1A,CFAP298,choline,INSIG2,NFIX,PPP3CA,TCIRG1,TMPRSS15,TNFSF11
	Cellular Function and Maintenance	7.14E-04-2.26E-02	CACNA1A,CACNG4,choline,NACC1,NFIX,PPP3CA,SYNJ1,TCIRG1,TNFSF11
	Cellular Assembly and Organization	7.83E-04-2.12E-02	CACNA1A,CACNG4,choline,KMT5B,NFIX,PPP3CA,SYNJ1,TNFSF11
	Cell Death and Survival	8.95E-04-2.26E-02	CACNA1A,choline,EVA1C,GAL,LYL1,NACC1,PPP3CA,TNFSF11
	Cell Morphology	1.09E-03-2.26E-02	CACNA1A,choline,GAL,NACC1,NFIX,PPP3CA,TNFSF11
	Cell-To-Cell Signaling and Interaction	1.2E-03-2.01E-02	CACNA1A,CACNG4,choline,GAL,PPP3CA,SYNJ1,TNFSF11
	Carbohydrate Metabolism	1.43E-03-1.28E-02	CHKA,choline,GAL,PPP3CA,SYNJ1
	Cell Cycle	1.43E-03-1.84E-02	CHKA,choline,GAL,NFIX,TNFSF11
	Cellular Compromise	1.43E-03-1.28E-02	choline,PPP3CA,TCIRG1,TNFSF11
	Embryonic Development	1.43E-03-2.17E-02	CACNA1A,CHKA,choline,INSIG2,KMT5B,LYL1,NACC1,NFIX,PPP3CA,TCIRG1,TNFSF11
	Inflammatory Response	1.43E-03-2.12E-02	CACNA1A,CACNG1,choline,GAL,NFIX,PPP3CA,TCIRG1,TNFSF11,UNC93B1
	Lipid Metabolism	1.43E-03-1.98E-02	ALDH3B1,CACNA1A,CHKA,choline,GAL,INSIG2,SYNJ1
	Organ Development	1.43E-03-2.17E-02	CACNA1A,choline,LYL1,NFIX,PPP3CA,TCIRG1,TNFSF11
	Small Molecule Biochemistry	1.43E-03-1.98E-02	ALDH3B1,CACNA1A,CHKA,choline,GAL,INSIG2,NACC1,SYNJ1,TCIRG1,TNFSF11
	Endocrine System Development and Function	2.85E-03-1.98E-02	choline,GAL
	Molecular Transport	3.68E-03-1.98E-02	CACNA1A,CCDC93,CHKA,choline,GAL,PPP3CA,SYNJ1,TCIRG1,TNFSF11,UNC93B1
	Organismal Survival	4.27E-03-6.27E-03	CACNA1A,CHKA,choline,INSIG2,KMT5B,NACC1,NFIX,PPP3CA,SYNJ1,TCIRG1,TNFSF11,UNC93B1
	Inflammatory Disease	6.85E-03-2.12E-02	CACNA1A,CACNG1,choline,GAL,NFIX,PPP3CA,TCIRG1,TNFSF11,UNC93B1
	Gene Expression	1.28E-02-1.84E-02	choline,GAL,IER2,LYL1,NACC1,NFIX,PAXBP1,PPP3CA,TNFSF11
	Hepatic System Disease	1.29E-02-1.29E-02	choline,PPP3CA,TNFSF11
Citric acid	Tissue Morphology	3E-05-4.03E-02	citric acid,GFRA1,IQSEC3,PDE9A,PDGFC,TBX3,TBX5,WASHC1
	Connective Tissue Disorders	1.13E-04-4.44E-02	citric acid,PDGFC,TBX3,TBX5,WDR4
	Organismal Injury and Abnormalities	1.13E-04-5E-02	CCDC172,citric acid,FAM107B,FKBP4,GFRA1,GLRB,IQSEC3,ITFG2,NRIP2,PDE9A,PDGFC,PKNOX1,PNLIP,PNLIPRP3,SLC37A1,SLC6A13,TBX3,TBX5,WDR4
	Skeletal and Muscular Disorders	1.13E-04-4.03E-02	citric acid,FKBP4,GLRB,PDE9A,PDGFC,TBX3,TBX5,WDR4
	Reproductive System Development and Function	3.48E-04-5E-02	citric acid,FKBP4,GFRA1,GLRB,TBX3
	Cellular Development	6.2E-04-4.76E-02	citric acid,GFRA1,PDGFC,PKNOX1,TBX3,TBX5,WASHC1
	Cellular Growth and Proliferation	6.2E-04-4.76E-02	citric acid,GFRA1,PDGFC,TBX3,TBX5,WASHC1
	Endocrine System Disorders	8.39E-04-4.28E-02	citric acid,FKBP4,PNLIP
	Gastrointestinal Disease	8.39E-04-4.28E-02	CCDC172,citric acid,FAM107B,FKBP4,GFRA1,GLRB,IQSEC3,NRIP2,PDE9A,PDGFC,PKNOX1,PNLIP,PNLIPRP3,SLC37A1,SLC6A13,TBX3,TBX5,WDR4
	Hereditary Disorder	8.39E-04-3.87E-02	citric acid,FKBP4,GFRA1,GLRB,PNLIP,TBX3,TBX5,WDR4
	Lipid Metabolism	8.39E-04-4.11E-02	citric acid,FKBP4,PNLIP,SLC6A13
	Metabolic Disease	8.39E-04-4.28E-02	citric acid,FKBP4,PKNOX1,PNLIP,PNLIPRP3,TBX3,TBX5
	Molecular Transport	8.39E-04-4.2E-02	citric acid,FKBP4,GFRA1,GLRB,PNLIP,SLC37A1,SLC6A13
	Nervous System Development and Function	8.39E-04-4.84E-02	citric acid,GFRA1,GLRB,IQSEC3,PKNOX1,TBX3
	Neurological Disease	8.39E-04-3.87E-02	citric acid,FKBP4,GFRA1,GLRB,PDE9A,PDGFC
	Nucleic Acid Metabolism	8.39E-04-2.16E-02	citric acid,PDE9A
	Small Molecule Biochemistry	8.39E-04-4.2E-02	citric acid,FKBP4,GFRA1,PDE9A,PDGFC,PKNOX1,PNLIP,SLC37A1,SLC6A13
	Carbohydrate Metabolism	1.68E-03-2.16E-02	citric acid,PKNOX1,PNLIP,SLC37A1
	Cell Cycle	1.68E-03-9.19E-03	citric acid,GFRA1
	Vitamin and Mineral Metabolism	1.68E-03-1.67E-02	citric acid,PNLIP
	Organismal Survival	2.67E-03-2.67E-03	citric acid,FKBP4,GFRA1,PDGFC,PKNOX1,TBX3,TBX5,WASHC1,WDR4
	Psychological Disorders	4.76E-03-3.47E-02	citric acid,FKBP4,GFRA1,GLRB,PDE9A,PNLIP
	Cell Signaling	1.33E-02-3.71E-02	citric acid,FKBP4,GFRA1,GLRB
	Hematological Disease	1.5E-02-3.36E-02	citric acid,FKBP4,GFRA1,PKNOX1
	Cellular Compromise	2.32E-02-2.65E-02	citric acid,WASHC1
Creatine	Hereditary Disorder	6.72E-04-3.86E-02	creatine,GEMIN2,GRHL2,PCSK6,SEC23A,TRAPPC6B
	Neurological Disease	6.72E-04-4.29E-02	creatine,GEMIN2,GRHL2,TRAPPC6B
	Organismal Injury and Abnormalities	6.72E-04-4.36E-02	C1D,creatine,CRYZ,GEMIN2,GRHL2,JMJD4,NCALD,PCSK6,PNN,PRSS38,SEC23A,SNAP47,SNRPA1,SORCS1,TRAPPC6B,TYW3,WDR92,WNT9A
	Skeletal and Muscular Disorders	6.72E-04-2.24E-02	creatine,GEMIN2,PCSK6,TRAPPC6B,WNT9A
	Cell Morphology	7.55E-04-3.93E-02	creatine,GRHL2,SEC23A
	Cellular Assembly and Organization	7.55E-04-2.46E-02	creatine,GEMIN2,SEC23A
	Cellular Compromise	7.55E-04-2.98E-02	creatine,GEMIN2
	Cellular Development	7.55E-04-4.58E-02	creatine,GRHL2
	Connective Tissue Development and Function	7.55E-04-4.36E-02	creatine,PCSK6,WNT9A
	Organ Morphology	7.55E-04-4.36E-02	creatine,GRHL2,PCSK6,WNT9A
	Organismal Development	7.55E-04-4.94E-02	creatine,GRHL2,PCSK6,WNT9A
	Skeletal and Muscular System Development and Function	7.55E-04-4.36E-02	creatine,GRHL2,PCSK6,WNT9A
	Small Molecule Biochemistry	7.55E-04-4.8E-02	creatine,PCSK6
	Tissue Development	7.55E-04-4.94E-02	creatine,GRHL2,PCSK6,WNT9A
	Tissue Morphology	7.55E-04-2.82E-02	creatine,GEMIN2,PCSK6
	Cell Death and Survival	1.51E-03-2.82E-02	creatine,GEMIN2,GRHL2,PCSK6
	Drug Metabolism	1.51E-03-9.03E-03	creatine,CRYZ
	Endocrine System Disorders	1.51E-03-3.74E-02	C1D,creatine,CRYZ,GRHL2,JMJD4,PCSK6,PNN,PRSS38,SEC23A,SNRPA1,SORCS1,TRAPPC6B,TYW3,WDR92,WNT9A
	Gastrointestinal Disease	1.51E-03-1.43E-02	creatine,PCSK6
	Nervous System Development and Function	1.51E-03-2.17E-02	creatine,WNT9A
	Protein Synthesis	2.26E-03-1.43E-02	creatine,PCSK6
	Molecular Transport	3.77E-03-2.46E-02	creatine,PNN
	Respiratory Disease	3.77E-03-2.61E-02	creatine,PCSK6
	Cell-To-Cell Signaling and Interaction	6.03E-03-4.51E-02	creatine,PNN
	Inflammatory Disease	6.03E-03-2.02E-02	creatine,WNT9A
	Inflammatory Response	6.03E-03-2.39E-02	creatine,WNT9A
	Cellular Function and Maintenance	9.78E-03-4.73E-02	creatine,WNT9A
	Psychological Disorders	1.13E-02-4.22E-02	creatine,GEMIN2
	Cellular Movement	1.5E-02-2.39E-02	creatine,PCSK6
	DNA Replication, Recombination, and Repair	1.87E-02-2.46E-02	creatine,CRYZ
Creatinine	Organismal Injury and Abnormalities	3.98E-05-4.88E-02	ACRV1,AKAP11,C6orf118,CHEK1,CHURC1,creatinine,CSPG5,EI24,ELP6,FAM43A,FEZ1,FNTB,KIF9,LSG1,MAX,Ngp,PATE2,PDE10A,PKNOX2,PLEKHG3,PTPN23,SCAP,SMARCC1,SPTB,STT3A,VWA8,XXYLT1,ZSWIM6
	Cardiovascular Disease	1.22E-03-2.53E-02	creatinine,PDE10A,SPTB
	Cell Death and Survival	1.22E-03-4.71E-02	CHEK1,creatinine,EI24,MAX,Ngp,PTPN23,SMARCC1,SPTB
	Cellular Assembly and Organization	1.22E-03-3.35E-02	AKAP11,creatinine,FEZ1,KIF9,PTPN23
	Cellular Compromise	1.22E-03-3.35E-02	AKAP11,CHEK1,creatinine,EI24,MAX,SMARCC1
	Connective Tissue Disorders	1.22E-03-2.64E-02	creatinine,FEZ1,SPTB,ZSWIM6
	DNA Replication, Recombination, and Repair	1.22E-03-3.94E-02	CHEK1,creatinine,PDE10A,SMARCC1
	Developmental Disorder	1.22E-03-1.69E-02	creatinine,MAX,SMARCC1,SPTB,STT3A,ZSWIM6
	Gastrointestinal Disease	1.22E-03-4.17E-02	ACRV1,AKAP11,C6orf118,CHEK1,CHURC1,creatinine,CSPG5,EI24,FAM43A,FEZ1,FNTB,KIF9,LSG1,MAX,PDE10A,PKNOX2,PLEKHG3,PTPN23,SCAP,SMARCC1,SPTB,VWA8,XXYLT1,ZSWIM6
	Hematological Disease	1.22E-03-2.68E-02	CHEK1,creatinine,FNTB,PDE10A,SPTB
	Hereditary Disorder	1.22E-03-1.21E-02	creatinine,MAX,PDE10A,SPTB,STT3A
	Metabolic Disease	1.22E-03-4.17E-02	creatinine,STT3A
	Neurological Disease	1.22E-03-4.3E-02	CHEK1,creatinine,EI24,MAX,PDE10A,SMARCC1,ZSWIM6
	Endocrine System Disorders	2.43E-03-4.5E-02	AKAP11,CHEK1,creatinine,CSPG5,EI24,FAM43A,FEZ1,FNTB,KIF9,LSG1,MAX,Ngp,PDE10A,PKNOX2,PLEKHG3,PTPN23,SCAP,SMARCC1,SPTB,STT3A,VWA8,XXYLT1,ZSWIM6
	Renal and Urological Disease	2.43E-03-4.52E-02	AKAP11,creatinine
	Molecular Transport	8.49E-03-3.71E-02	creatinine,PDE10A,SCAP
	Immunological Disease	1.45E-02-4.52E-02	CHEK1,creatinine,FNTB
D-glucose	Nervous System Development and Function	3.45E-06-7.61E-03	CD40,CDH2,CYFIP1,D-glucose,KCNIP4,MMP9,PTF1A,SLC12A5,ZNF335
	Organ Development	3.45E-06-7.61E-03	CD40,CDH2,D-glucose,KCNIP4,MMP9,PTF1A,SLC12A5,ZNF335
	Carbohydrate Metabolism	2.39E-05-7.61E-03	D-glucose,MMP9,PIP4K2A,PLTP
	Cell-To-Cell Signaling and Interaction	4.1E-05-7.61E-03	CD40,CDH2,D-glucose,MMP9,PLTP,SLC12A5
	Cellular Assembly and Organization	5.12E-05-6.72E-03	CDH2,CYFIP1,D-glucose,HACE1,MMP9,PTF1A,SLC12A5,ZNF335
	Cellular Function and Maintenance	5.12E-05-7.61E-03	CCDC115,CD40,CDH2,CYFIP1,D-glucose,MMP9,MSRB2,PTF1A,SLC12A5,ZNF335
	Cell Death and Survival	6.81E-05-7.61E-03	CD40,CDH2,D-glucose,MMP9,MSRB2,PLTP
	Endocrine System Disorders	1.59E-04-7.61E-03	CD40,CDH2,D-glucose,MMP9,PTF1A
	Gastrointestinal Disease	1.59E-04-7.61E-03	CD40,CDH2,CTSA,D-glucose,KCNIP4,MMP9,PTF1A
	Organismal Injury and Abnormalities	1.59E-04-7.61E-03	ACOT8,CCDC115,CD40,CDH2,CTSA,D-glucose,HACE1,IMP4,KCNIP4,MMP9,MSRB2,NEURL2,PIP4K2A,PLTP,PTF1A,SLC12A5,TNNC2,ZNF335
	Lipid Metabolism	3.95E-04-7.61E-03	ACOT8,CD40,CTSA,D-glucose,MMP9,PIP4K2A,PLTP
	Molecular Transport	3.95E-04-7.61E-03	CD40,D-glucose,MMP9,PIP4K2A,PLTP,SLC12A5
	Small Molecule Biochemistry	3.95E-04-7.61E-03	ACOT8,CCDC115,CD40,CTSA,D-glucose,MMP9,PIP4K2A,PLTP,SLC12A5
	Tumor Morphology	5.92E-04-6.53E-03	CD40,CDH2,D-glucose,MMP9
	Protein Synthesis	6.25E-04-7.61E-03	CD40,CDH2,CTSA,CYFIP1,D-glucose,HACE1,MMP9,PCIF1,PLTP
	Cellular Movement	6.66E-04-7.61E-03	CD40,CDH2,D-glucose,HACE1,MMP9,PLTP,PTF1A,SLC12A5
	Hematological System Development and Function	6.66E-04-7.61E-03	CD40,D-glucose,MMP9,PLTP
	Immune Cell Trafficking	6.66E-04-6.53E-03	CD40,D-glucose,MMP9,PLTP
	Inflammatory Response	6.66E-04-7.61E-03	CD40,D-glucose,MMP9,PLTP
	Cardiovascular Disease	7.4E-04-6.53E-03	CD40,CDH2,CTSA,D-glucose,HACE1,MMP9,PLTP,SLC12A5
	Cell Signaling	7.85E-04-6.53E-03	CDH2,CYFIP1,D-glucose,HACE1
	Cell Morphology	8.8E-04-7.61E-03	CD40,CDH2,CYFIP1,D-glucose,HACE1,MMP9,MSRB2,PTF1A,SLC12A5,ZNF335
	Metabolic Disease	9.05E-04-7.61E-03	CCDC115,CD40,CTSA,D-glucose,MMP9,PLTP,PTF1A
	Cardiovascular System Development and Function	1.09E-03-7.61E-03	CD40,CDH2,D-glucose,MMP9
	Cell Cycle	1.09E-03-6.53E-03	CD40,D-glucose,MMP9
	Cellular Compromise	1.09E-03-7.61E-03	CD40,CDH2,D-glucose,MMP9,PLTP
	Cellular Development	1.09E-03-7.61E-03	CD40,CDH2,CYFIP1,D-glucose,MMP9,PTF1A,SLC12A5,ZNF335
	Cellular Growth and Proliferation	1.09E-03-7.61E-03	CD40,CDH2,CYFIP1,D-glucose,MMP9,PTF1A,SLC12A5,ZNF335
	Connective Tissue Development and Function	1.09E-03-7.61E-03	CDH2,D-glucose,MMP9
	Connective Tissue Disorders	1.09E-03-7.61E-03	CD40,CTSA,D-glucose,MMP9,TNNC2,ZNF335
	DNA Replication, Recombination, and Repair	1.09E-03-7.43E-03	CD40,D-glucose
	Developmental Disorder	1.09E-03-4.36E-03	CCDC115,CTSA,D-glucose,MMP9,PTF1A,SLC12A5,ZNF335
	Digestive System Development and Function	1.09E-03-7.61E-03	D-glucose,MMP9,PTF1A
	Embryonic Development	1.09E-03-7.61E-03	CD40,CDH2,D-glucose,MMP9,PTF1A,SLC12A5,ZNF335
	Endocrine System Development and Function	1.09E-03-7.61E-03	CD40,D-glucose,MMP9,PTF1A
	Hematological Disease	1.09E-03-6.53E-03	CD40,D-glucose,MMP9,PLTP
	Hepatic System Disease	1.09E-03-6.53E-03	CD40,CDH2,D-glucose,KCNIP4,MMP9
	Hereditary Disorder	1.09E-03-7.61E-03	CCDC115,CD40,CTSA,D-glucose,HACE1,MMP9,PTF1A,SLC12A5,ZNF335
	Neurological Disease	1.09E-03-7.61E-03	CD40,CTSA,D-glucose,HACE1,MMP9,PTF1A,SLC12A5,ZNF335
	Nucleic Acid Metabolism	1.09E-03-7.61E-03	ACOT8,CD40,D-glucose
	Organ Morphology	1.09E-03-7.61E-03	CDH2,D-glucose,MMP9,PTF1A,ZNF335
	Organismal Development	1.09E-03-7.61E-03	CD40,CDH2,CTSA,CYFIP1,D-glucose,MMP9,PTF1A,SLC12A5,ZNF335
	Renal and Urological Disease	1.09E-03-4.36E-03	D-glucose,MMP9
	Renal and Urological System Development and Function	1.09E-03-7.61E-03	D-glucose,MMP9
	Respiratory Disease	1.09E-03-6.53E-03	CD40,D-glucose,MMP9,PLTP
	Skeletal and Muscular Disorders	1.09E-03-7.61E-03	CD40,CTSA,D-glucose,HACE1,MMP9,TNNC2,ZNF335
	Skeletal and Muscular System Development and Function	1.09E-03-7.61E-03	CDH2,D-glucose,MMP9
	Tissue Development	1.09E-03-7.61E-03	CD40,CDH2,CYFIP1,D-glucose,MMP9,PTF1A,SLC12A5,ZNF335
	Tissue Morphology	1.09E-03-7.61E-03	CD40,CDH2,D-glucose,MMP9,PTF1A,SLC12A5
	Vitamin and Mineral Metabolism	1.2E-03-5.44E-03	ACOT8,D-glucose,MMP9,PLTP
	Behavior	2.18E-03-7.17E-03	CYFIP1,D-glucose,MMP9,SLC12A5
	Drug Metabolism	2.18E-03-6.16E-03	CD40,D-glucose,MMP9
	Inflammatory Disease	2.18E-03-7.61E-03	CD40,D-glucose,MMP9,TNNC2
	Post-Translational Modification	2.18E-03-7.61E-03	D-glucose,MMP9,MSRB2
	Protein Degradation	2.18E-03-7.61E-03	D-glucose,MMP9
	Nutritional Disease	3.1E-03-3.1E-03	D-glucose,TNNC2
	Hair and Skin Development and Function	5.44E-03-6.53E-03	D-glucose,MMP9
L-Alanine	Cell Morphology	1.7E-04-4.9E-02	CACNA1A,FOXM1,L-alanine,NACC1,NFIX,PITPNA,PPARGC1B,RILP,RPA1,SCARF1,SEC23A,SERPINF1,TEAD4,TULP3,WASHC1,WDR81
	Nervous System Development and Function	1.7E-04-4.82E-02	ASPA,CACNA1A,FKBP4,GEMIN2,IQSEC3,L-alanine,NACC1,NFIX,PITPNA,RTN4RL1,SCARF1,SERPINF1,SERPINF2,TULP3,WDR81
	Organismal Development	1.7E-04-4.82E-02	ASPA,CACNA1A,CSNK1A1,EDIL3,FKBP4,FOXM1,L-alanine,LYL1,NACC1,NFIX,PITPNA,PPARGC1B,RTN4RL1,SCARF1,SERPINF1,SERPINF2,TEAD4,TULP3,WASHC1,WDR81
	Tissue Development	1.7E-04-4.64E-02	ASPA,CACNA1A,CSNK1A1,FKBP4,FOXM1,GEMIN2,L-alanine,LYL1,NACC1,NFIX,PITPNA,PPARGC1B,RTN4RL1,SCARF1,SERPINF1,SERPINF2,TEAD4,TULP3,WASHC1,WDR81
	Cellular Development	2.48E-04-4.82E-02	ASPA,CACNA1A,CSNK1A1,FKBP4,FOXM1,GEMIN2,L-alanine,LYL1,NACC1,NFIX,PITPNA,PNN,PPARGC1B,RTN4RL1,SCARF1,SERPINF1,SERPINF2,TEAD4,TULP3,WASHC1
	Cellular Assembly and Organization	6.49E-04-4.82E-02	CACNA1A,CSNK1A1,EDIL3,FKBP4,FOXM1,GEMIN2,IQSEC3,L-alanine,NFIX,PITPNA,PPARGC1B,RILP,RPA1,RTN4RL1,SCARF1,SEC23A,SERPINF1,SERPINF2,TEAD4,WASHC1,WDR81
	Cell Cycle	8.57E-04-4.82E-02	CSNK1A1,FOXM1,L-alanine,NFIX,PNN,PPARGC1B,PRPF8,RPA1,SERPINF1,SPATA22
	Cellular Function and Maintenance	1.68E-03-3.49E-02	CACNA1A,CSNK1A1,EDIL3,FKBP4,FOXM1,L-alanine,NACC1,NFIX,PITPNA,PPARGC1B,RILP,RPA1,SCARF1,SERPINF1,TEAD4,WASHC1,WDR81
	Amino Acid Metabolism	1.97E-03-4.06E-02	ASPA,CACNA1A,L-alanine,SERPINF1,SLC43A2
	Carbohydrate Metabolism	1.97E-03-4.63E-02	L-alanine,PITPNA
	Cellular Growth and Proliferation	1.97E-03-4.82E-02	ASPA,CACNA1A,CSNK1A1,FKBP4,FOXM1,GEMIN2,L-alanine,LYL1,NACC1,NFIX,PITPNA,PNN,PPARGC1B,SCARF1,SERPINF1,SERPINF2,TEAD4,TULP3,WASHC1
	Hepatic System Development and Function	1.97E-03-3.87E-02	FOXM1,L-alanine,PITPNA
	Molecular Transport	1.97E-03-4.44E-02	ASPA,CACNA1A,EDIL3,FKBP4,L-alanine,PITPNA,PNN,PPARGC1B,RILP,SEC23A,SERPINF1,SLC43A2,STX10,WASHC1
	Small Molecule Biochemistry	1.97E-03-4.82E-02	ASPA,CACNA1A,EDIL3,FKBP4,L-alanine,NACC1,PITPNA,PPARGC1B,RILP,RPA1,SERPINF1,SLC43A2
Pyruvic acid	Organismal Injury and Abnormalities	4.01E-05-4.61E-02	BRINP1,GALR1,OAZ2,PAX3,PIF1,pyruvic acid,REV1,TRIP4,ZNF516,ZNF609
	Gastrointestinal Disease	2.38E-04-3.81E-02	GALR1,OAZ2,PAX3,PIF1,pyruvic acid,REV1,TRIP4,ZNF516,ZNF609
	Cardiovascular Disease	4.2E-04-3.39E-02	GALR1,pyruvic acid
	Cell Death and Survival	4.2E-04-3.43E-02	BRINP1,PAX3,pyruvic acid
	Cell Morphology	4.2E-04-3.76E-02	BRINP1,PAX3,pyruvic acid,REV1
	Dermatological Diseases and Conditions	4.2E-04-2.1E-03	PAX3,pyruvic acid
	Embryonic Development	4.2E-04-3.83E-02	BRINP1,PAX3,pyruvic acid,REV1
	Hereditary Disorder	4.2E-04-4.61E-02	PAX3,pyruvic acid,REV1,TRIP4
	Lipid Metabolism	4.2E-04-3.35E-02	GALR1,pyruvic acid
	Molecular Transport	4.2E-04-3.06E-02	GALR1,pyruvic acid
	Nervous System Development and Function	4.2E-04-3.76E-02	BRINP1,GALR1,PAX3,pyruvic acid
	Neurological Disease	4.2E-04-4.54E-02	BRINP1,GALR1,PAX3,pyruvic acid,REV1,TRIP4
	Nucleic Acid Metabolism	4.2E-04-4.88E-02	GALR1,PAX3,pyruvic acid,REV1
	Organismal Development	4.2E-04-3.83E-02	BRINP1,PAX3,pyruvic acid
	Skeletal and Muscular Disorders	4.2E-04-4.54E-02	BRINP1,PAX3,pyruvic acid,REV1,TRIP4
	Small Molecule Biochemistry	4.2E-04-4.88E-02	GALR1,OAZ2,PAX3,pyruvic acid,REV1
	Tissue Development	4.2E-04-3.92E-02	GALR1,PAX3,pyruvic acid,TRIP4,ZNF516
	Tissue Morphology	4.2E-04-3.76E-02	BRINP1,PAX3,pyruvic acid,TRIP4
	Carbohydrate Metabolism	8.39E-04-4.54E-02	GALR1,pyruvic acid
	Cardiovascular System Development and Function	8.39E-04-3.83E-02	PAX3,pyruvic acid
	Cellular Compromise	8.39E-04-4.2E-02	PAX3,pyruvic acid
	Organ Development	8.39E-04-3.83E-02	PAX3,pyruvic acid
	Skeletal and Muscular System Development and Function	8.39E-04-2.28E-02	PAX3,pyruvic acid,TRIP4
	Cell-To-Cell Signaling and Interaction	1.26E-03-3.43E-02	GALR1,PAX3,pyruvic acid
	Cellular Function and Maintenance	1.26E-03-1.09E-02	pyruvic acid,REV1
	Cellular Growth and Proliferation	1.26E-03-4.88E-02	BRINP1,GALR1,PAX3,pyruvic acid
	DNA Replication, Recombination, and Repair	1.26E-03-4.88E-02	PAX3,pyruvic acid,REV1
	Cellular Development	1.68E-03-4.88E-02	BRINP1,GALR1,PAX3,pyruvic acid,REV1,TRIP4,ZNF516
	Cellular Movement	1.68E-03-2.28E-02	PAX3,pyruvic acid
	Connective Tissue Development and Function	2.93E-03-2E-02	BRINP1,PAX3,pyruvic acid,REV1,ZNF516
	Amino Acid Metabolism	4.19E-03-9.61E-03	PAX3,pyruvic acid
	Cellular Assembly and Organization	5.02E-03-1.75E-02	pyruvic acid,ZNF516
	Vitamin and Mineral Metabolism	9.61E-03-2.69E-02	PAX3,pyruvic acid
	Psychological Disorders	4.54E-02-4.54E-02	pyruvic acid,REV1
Succinic acid	Organismal Injury and Abnormalities	8.65E-06-4.99E-02	ASAP3,ATXN7L3,BTNL9,CEP70,CYP4V2,E2F2,F11,FAIM,FAM149A,FAM171A2,FAM193A,FAT1,FZD2,GPATCH8,GRN,HNRNPR,ID3,ITGA2B,KCTD16,KLKB1,MGAT1,MTNR1A,PIK3CB,RLF,RNF4,RPL11,RUNDC3A,SH3BP2,SLC25A39,SLC4A1,SMAP2,succinic acid,TCEA3,TMCO2,TMUB2,TNIP2,TRIM7,UBTF,ZFP62,ZMPSTE24,ZNF436
	Gastrointestinal Disease	2.28E-05-4.65E-02	ASAP3,ATXN7L3,BTNL9,CEP70,CYP4V2,E2F2,F11,FAIM,FAM171A2,FAM193A,FAT1,FZD2,GPATCH8,GRN,HNRNPR,ID3,ITGA2B,KCTD16,KLKB1,MGAT1,MTNR1A,PIK3CB,RLF,RNF4,RUNDC3A,SH3BP2,SLC25A39,SLC4A1,SMAP2,succinic acid,TCEA3,TMCO2,TMUB2,TNIP2,TRIM7,UBTF,ZFP62,ZMPSTE24,ZNF436
	Cell-To-Cell Signaling and Interaction	1.72E-04-4.99E-02	BTNL9,F11,FAT1,FZD2,GRN,ID3,ITGA2B,KLKB1,MGAT1,PIK3CB,SH3BP2,succinic acid
	Hematological System Development and Function	1.72E-04-4.99E-02	BTNL9,E2F2,F11,GRN,ID3,ITGA2B,KLKB1,PIK3CB,SH3BP2,SLC4A1,succinic acid,TNIP2,ZMPSTE24
	Inflammatory Response	1.72E-04-4.99E-02	F11,GRN,ID3,ITGA2B,KLKB1,PIK3CB,SH3BP2,succinic acid
	Free Radical Scavenging	3.58E-04-3.58E-04	GRN,succinic acid
	Molecular Transport	3.58E-04-4.32E-02	FAT1,GRN,KLKB1,PIK3CB,SLC4A1,succinic acid,UBTF
	Small Molecule Biochemistry	3.58E-04-4.32E-02	FAT1,GRN,KLKB1,PIK3CB,SLC4A1,succinic acid
	Cell Death and Survival	1.35E-03-4.15E-02	E2F2,F11,FAIM,FAT1,FZD2,GRN,ID3,MTNR1A,PIK3CB,RPL11,SH3BP2,SLC4A1,succinic acid,TNIP2,UBTF,ZMPSTE24
	Hepatic System Disease	1.55E-03-3.97E-02	ASAP3,ATXN7L3,BTNL9,E2F2,F11,FAIM,FAM193A,FAT1,GRN,ID3,ITGA2B,KLKB1,MGAT1,PIK3CB,RLF,SH3BP2,SLC4A1,succinic acid
	Cellular Function and Maintenance	1.76E-03-4.99E-02	CEP70,FZD2,GRN,ID3,ITGA2B,MTNR1A,PIK3CB,RLF,SH3BP2,SLC4A1,succinic acid,TNIP2,ZMPSTE24
	Dermatological Diseases and Conditions	1.76E-03-4.48E-02	E2F2,KLKB1,PIK3CB,succinic acid,ZMPSTE24
	Hereditary Disorder	1.76E-03-4.15E-02	CYP4V2,E2F2,F11,FZD2,GRN,ITGA2B,KLKB1,MTNR1A,PIK3CB,RPL11,SH3BP2,SLC4A1,SMAP2,succinic acid,UBTF,ZMPSTE24
	Renal and Urological Disease	1.76E-03-4.99E-02	ASAP3,E2F2,FAM171A2,FAT1,GRN,ID3,ITGA2B,PIK3CB,SLC4A1,succinic acid,TCEA3,ZNF436
	Skeletal and Muscular Disorders	1.76E-03-4.99E-02	GRN,ITGA2B,MTNR1A,succinic acid,ZMPSTE24
	Drug Metabolism	5.28E-03-1.58E-02	KLKB1,succinic acid
	Lipid Metabolism	5.28E-03-4.32E-02	FAT1,KLKB1,PIK3CB,succinic acid
	Reproductive System Disease	5.28E-03-4.65E-02	ASAP3,BTNL9,CEP70,E2F2,F11,FAM193A,FAT1,FZD2,GRN,HNRNPR,ID3,ITGA2B,KCTD16,MTNR1A,PIK3CB,RLF,RPL11,SH3BP2,SMAP2,succinic acid,TCEA3,TMUB2,TRIM7,ZMPSTE24,ZNF436
	Hepatic System Development and Function	1.23E-02-3.81E-02	E2F2,GRN,succinic acid
	Organismal Survival	1.52E-02-4.38E-02	E2F2,F11,FAIM,FAT1,GRN,ID3,ITGA2B,MGAT1,PIK3CB,SLC4A1,succinic acid,UBTF,ZMPSTE24
L-lactic acid	Cellular Function and Maintenance	2.12E-04-4.92E-02	CIB3,DCLRE1C,FHIT,FLNB,HSH2D,KPNA2,L-lactic acid,POLG2,PTCD2,RAB8A,SUV39H2
