# Supplementary material for: Genomic Heritability and Genome-Wide Association Studies of Plasma Metabolites in Crossbred Beef Cattle
Source: Front Genet. 2020 Sep 24;11:538600. doi: 10.3389/fgene.2020.538600 (PMC7542097; doi:10.3389/fgene.2020.538600)
Supplement: Supplementary file 3 [file Table_3.XLSX]

## Sheet: Sheet1
Table S3. Networks of potential biological mechanisms underlying the associations between heritable metabolites and genes: score of pathways, molecules that involoved in the pathways and their top diseases and funtions.
Trait	Molecules in Network	Score	Top Diseases and Functions
Acetone	26s Proteasome,Alpha tubulin,BCR (complex),caspase,CD63,CDK2,CDK4/6,cytochrome C,DGKA,ERBB3,ERK1/2,ESYT1,FKBP5,Hsp70,Hsp90,ITGA7,Mek,MGAT3,p70 S6k,PA2G4,PI3K p85,PMEL,PP2A,PRKN,Rb,RNF41,SARNP,TCR,TMBIM6,TUBA1A,TUBA1B,TUBA1C,tubulin,tubulin (family),UHRF1BP1L	39	[Cancer, Organismal Injury and Abnormalities, Respiratory Disease]
	acetone,Akt,ATF4,CAMK2D,CD3,CLPS,DHH,ERK,estrogen receptor,FSH,GBE1,GDF11,Gsk3,Histone h3,Histone h4,IKZF4,IL12 (complex),Immunoglobulin,Integrin,Lh,MAP3K4,Mapk,MAPK14,MMP19,P38 MAPK,PI3K (complex),Pkc(s),PYM1,Rac,Rnr,RPS26,SMARCC2,SPATS2,SRPK1,Vegf	34	[Cellular Development, Cellular Growth and Proliferation, Hematological System Development and Function]
	1-palmitoyl-lysophosphatidic acid,ALB,Ca2 ,CACNA1I,Cetn4/Gm7094,D-pantothenic acid,Dcc dimer,EGFR,endomorphin-1,FAM186B,FYN,Gma3,GPR149,GPR32,GPR45,HNF4A,IL6,LILRA5,MAPK1,MIEF1,NABP2,NEK4,NMUR2,ORMDL2,PPP1R1C,PRPH,PTPN6,RPS19BP1,RTRAF,SCYL2,SUOX,TROAP,VN1R1,ZC3H10,ZNF300	26	[Gastrointestinal Disease, Hepatic System Disease, Organismal Injury and Abnormalities]
	7alpha-hydroxytestosterone,ACTR6,APP,AR,ARMC12,Bag1-Hsp-Stub1-misfolded,BLOC1S1,CD44,DNAJB13,DNAJB14,DNAJB3,Dnajb3,DNAJB7,Dnajc19,DNAJC22,DNAJC25,DNAJC27,DNAJC4,DNAJC5B,DNAJC5G,ENTHD1,ESR1,HADHA,HSP,Hsp-misfolded,HSP-MR,MYL10,MYL5,MYL6,MYL6B,PRPF40B,RAB5B,RACGAP1,Sacs,SLC26A8	19	[Cancer, Connective Tissue Development and Function, Skeletal and Muscular System Development and Function]
	AGPAT4,BANCR,BRAF,Cdkal1,Ck2,FMNL3,GNG2,Insulin,Interferon alpha,Jnk,LHFPL5,LMBR1L,LMNA,MCRS1,METTL7B,mir-330,mir-370,miR-370-3p (and other miRNAs w/seed CCUGCUG),MKP2/5,neopterin,NFkB (complex),NT3,PTPRN,RDH5,RTN4,SLC30A8,SLC7A1,SNX19,Taok2,TMEM140,TMEM14C,TRAF1-TRAF2-TRAF3,ubiquinone 9,YIPF6,ZNF675	14	[Cancer, Neurological Disease, Organismal Injury and Abnormalities]
Betaine	AMPK,Ap1,calpain,Collagen type II,Collagen(s),Creb,elastase,ERK1/2,FZD5,IgG,Igm,IL-1R,IL1,IL12 (complex),IL1A,IL1F10,IL1RN,IL23,IL36A,IL36G,IL36RN,IL37,Immunoglobulin,JINK1/2,LDL,Lh,Mek,Mmp,Nos,p70 S6k,PLG,Pro-inflammatory Cytokine,SAA,Tgf beta,TSH	19	[Cell Signaling, Cell-To-Cell Signaling and Interaction, Hair and Skin Development and Function]
	AKT1,Ces1b/Ces1c,Ck2,CPT1A,HEXD,HSPA5,LIPE,LMNA,METTL21A,MLIP,Nolc1,OTUD3,PABPC1L,PPIP5K1,PRKDC,PRKN,R3HDM1,RAP1GAP2,SELENOO,SFT2D2,SLC22A1,SLC22A2,SLC35A4,SLITRK1,SNORC,SPIDR,TBC1D22A,TDRD9,TENT4A,TMEM107,TMEM14B,TMPRSS4,TRIM25,TUBGCP6,YWHAB	19	[Cell-To-Cell Signaling and Interaction, Molecular Transport, Small Molecule Biochemistry]
	Actin,Akt,Alpha catenin,ALT,betaine,caspase,CD3,chemokine,Collagen type I,CREB1,cytokine,ERK,EZR,FSH,Gsk3,HDAC10,Histone h3,Histone h4,IGF2R,IL1B,Insulin,Jnk,Mapk,NFkB (complex),P38 MAPK,PI3K (complex),Pka,Pkc(s),PP2A,RAS,Ras homolog,RNA polymerase II,SYTL3,UBE2V2,Vegf	17	[Lipid Metabolism, Cell-To-Cell Signaling and Interaction, Lipid Metabolism]
	ACY3,Akt,ARAP2,ASPA,ATP8B1,CAMK2N1,CCNYL1,CKAP2L,FAM111A,FRMD4A,FUCA1,GLIPR1,GPX2,INPP4A,KDM1A,MT1L,NEIL3,NUPR1,OIP5-AS1,PLEKHM3,PROP1,PTTG1IP,RNASE4,selenomethionine,SLC22A3,SPATA22,ST18,SYTL2,TCF7L2,TEP1,THG1L,TP53,triiodothyronine, reverse,Ube3,UCA1	12	[Cancer, Connective Tissue Disorders, Organismal Injury and Abnormalities]
	CRYGB,CRYGC,HSF4,MAF	5	[Hereditary Disorder, Ophthalmic Disease, Organismal Injury and Abnormalities]
Choline	6-thioguanosine 5'-diphosphate,Akt,cacn,CACNA1A,CACNA1F,CACNA1I,CACNA2D4,Cacng,CACNG1,CACNG4,CACNG5,CACNG6,CACNG7,Calcineurin protein(s),CATSPER,CHKA,choline,ERK,GAL,HELZ,Igm,Immunoglobulin,INSIG2,Insulin,NDUFS8,NFIX,NFkB (complex),PHF24,PPP3CA,RNA polymerase II,SYNJ1,TCIRG1,TNFSF11,UNC93B1,voltage-gated calcium channel	40	[Connective Tissue Disorders, Neurological Disease, Organismal Injury and Abnormalities]
	ALDH3B1,ALDH3B2,ANKIB1,BTF3L4,BVES,C11orf24,CCDC93,CDH22,CFAP298,CTNNB1,EFTUD2,EVA1C,GPA33,HIST1H4A,HNRNPL,IGSF9B,KMT5B,LRRN1,MEGF6,NACC1,NXPH4,PAXBP1,PPP6R3,PRSS56,RNF123,SELENOW,SGSM1,SSPO,TRMT1,TTC21A,UBC,URB1,USP40,ZFAND3,ZNF727	25	[Cardiovascular Disease, Developmental Disorder, Gastrointestinal Disease]
	ART3,BCL9,beta-estradiol,CDCA7,CHODL,CLDND1,CPT1C,D-glucose,FMO5,GPR12,GPRC6A,HTRA3,IER2,INHIBIN B,KCNMB1,KLK1,KLK11,KLK15,KLK6,LYL1,miR-124-3p (and other miRNAs w/seed AAGGCAC),N,N-dimethylarginine,PAPSS2,PREP,PTTG1IP,RDH10,SLC22A5,SLC39A6,STX10,SUSD2,TMPRSS15,TSKU,UCN3,WFDC2,ZBED3	10	[Carbohydrate Metabolism, Cell-To-Cell Signaling and Interaction, Nervous System Development and Function]
Citric acid	ADAT1,CCDC172,DMD,ELAVL1,FAM107B,FAM120AOS,FAM131A,GLRB,IQSEC3,ITFG2,KLF3,LTO1,MFSD14A,MFSD14B,OTULINL,PHTF2,PKNOX1,PLEKHF2,RAP1GAP2,SLC25A43,SLC37A1,SLC6A13,SMIM13,SRF,TBX3,TBX5,TLNRD1,TM7SF3,TMEM241,TNIP2,TRIM25,WDR4,ZBTB41,ZFAND3,ZNF77	28	[Embryonic Development, Organismal Development, Tissue Morphology]
	AADAC,ANGPT4,beta-muricholic acid,Ca2 ,cholesterol,citric acid,CMTM8,Cyp2j5,CYP4Z1,Dcc dimer,delta-tocopherol,dihydrotestosterone,DOK6,EGFR,EPHX4,ERK1/2,Erk1/2 dimer,ESR1,FAM186A,FKBP4,GFRA1,hexanoic acid,LMTK3,MUC15,N-docosahexaenoylethanolamine,NRIP2,PDE9A,PDGFC,PNLIP,PNLIPRP3,PNPLA4,PNPLA5,RET,triacylglycerol lipase,WASHC1	22	[Cancer, Neurological Disease, Organismal Injury and Abnormalities]
Creatine	APP,C19orf12,C1D,creatine,CRYZ,ESR2,GEMIN2,GRHL2,IL1B,IL6,ITGB1,JMJD4,MYC,NCALD,NIM1K,NOVA1,PAX6,PCSK6,PNN,PP2D1,PPP1CA,Prg4,PRSS38,SEC23A,SMAD3,SMARCA4,SNAP47,SNRPA1,SORCS1,SORL1,SSH3,TRAPPC6B,TYW3,WDR92,WNT9A	55	[Cancer, Connective Tissue Disorders, Organismal Injury and Abnormalities]
Creatinine	ACRV1,beta-estradiol,C5orf15,CHEK1,creatinine,CSPG5,ELAVL1,ELP6,EZH2,FANCD2,Histone h3,KIAA0895,Magea3 (includes others),MAX,Ngp,NRG1,PLEKHG3,POU2F3,prostaglandin h2,PRRT4,PRXL2C,PTGS2,Rab15,Rasl2-9,SAYSD1,SCAP,SHOC1,SLC10A3,SPOCK2,STARD3NL,STT3A,TCHHL1,VWA8,XXYLT1,ZSWIM6	35	[Cancer, Organismal Injury and Abnormalities, Reproductive System Disease]
	AKAP11,ALKBH7,alpha-muricholic acid,APP,AXIN1,C11orf52,C11orf71,C6orf118,CALML4,CHURC1,DTWD1,EI24,ERK,FAM43A,FEZ1,FNTB,FOS,HNF4A,HTT,KIF9,KLF3,LSG1,MCEE,NBPF3,omega-muricholic acid,PDE10A,PKNOX2,PP2D1,PTPN23,PURG,SMARCC1,SMARCD1,SPTB,TP53,TP53TG5	35	[Cell Death and Survival, Cellular Assembly and Organization, Cellular Compromise]
D-Glucose	ANKRD35,APC2,ARHGAP24,CTNNB1,CTSA,CYFIP1,Diaph2,DUSP27,FMR1,GMPR,HACE1,IMP4,JADE3,JPH3,KIAA1217,LMTK3,mir-128,MYO16,NEURL2,NPM1,NYAP1,PCIF1,PPP1CA,PREX2,PRL,PROKR1,PTPN18,RAC1,RPL10,SEMA5A,SLC12A5,SNHG20,ST6GALNAC1,VIM,ZSWIM3	24	[Cell Signaling, Cellular Assembly and Organization, Cellular Movement]
	1,4-glucan,ACOT8,ADGRE3,BPI,C3AR1,CAT,CCDC115,Ccr2,COL1A2,DEFA4,DLEU1,ELAVL1,Fcna,GPR180,GPR78,GPR88,IL1/IL6/TNF,KCNIP4,LILRA5,miR-139-3p (miRNAs w/seed GGAGACG),MSRB2,NFkB (complex),PIN1,PIP4K2A,PTF1A,RABL2B,RNA polymerase II,SLC16A5,Slpi (includes others),TAP1,TNF,TRAM2,tretinoin,TUBGCP5,ZSWIM1	18	[Cell Cycle, Cellular Growth and Proliferation, Infectious Diseases]
	ADCY,Akt,Ap1,CD40,CDH2,Collagen type I,Collagen(s),cytokine,D-glucose,ERK,ERK1/2,Fibrinogen,Gsk3,HDL,Histone h3,Histone h4,Hsp70,IL1,Immunoglobulin,JAK,JINK1/2,Jnk,MAP2K1/2,Mapk,MMP9,P38 MAPK,PI3K (complex),Pka,PLTP,Tgf beta,Tnf (family),TNNC2,Vegf,Wnt,ZNF335	15	[Carbohydrate Metabolism, Cell Death and Survival, Cell-To-Cell Signaling and Interaction]
L-Alanine	Akt,Akt-Calmodulin-Hsp90-Nos3,CACNA1A,CSNK1A1,cyclobutane pyrimidine dimer,Cyp2j9,ECSCR,FKBP4,FKBP51-TEBP-GR-HSP90-HSP70,FKBP52-Dyenin-Glucocorticoid-GR-HSP90,FOXM1,GEMIN2,Hsp70,Hsp90,IER2,IgG,IGLC3,inositol 1-phosphate,inositol 2-phosphate,Insulin,NFIX,PITPNA,PNN,PPARGC1B,PRPF8,RNA polymerase II,RPA1,SCARF1,SERPINF,SERPINF1,SERPINF2,snRNP-IgG Immune complex,TEAD4,Vegf,WASHC1	40	[Cellular Assembly and Organization, Cellular Development, Nervous System Development and Function]
	4-hydroxy-N-desmethyltamoxifen,5beta-dihydrotestosterone,Ahr-aryl hydrocarbon-Arnt-Esr1,androst-4-ene-3beta,17beta-diol,ANO2,ARMCX2,C12orf57,CCDC127,equilenin,ESR1,ESR2,estrone sulfate,ITGB1,KLRC4,LILRB5,LMTK3,MBTD1,MMP24,NRIP2,NTRK1,PCDHB14,PPP1CA,RAB5C,SEC23A,SENP7,SLC10A3,SLC2A4RG,STX10,TLCD2,TRAPPC6B,TRMT10C,TULP3,VIM,WDR81,ZBTB11	20	[Cancer, Cell Cycle, Cellular Compromise]
	ABLIM2,ACTA2,AKT1,ANGPTL1,ANKIB1,ARHGEF37,CFHR3,FAM13A,GCM2,heparin,HNRNPL,IMPG2,IQSEC3,LRRK2,LRRN1,Mapre2,NRG3,NXPH4,OTUD3,PARVB,PCYT1B,PLEKHA2,PTH,RAP1GAP2,RHNO1,RNF165,RTN4RL1,SLC43A2,SMYD4,SPATA22,TSTA3,UBC,USP40,UTRN,ZFAND3	18	[Cell-To-Cell Signaling and Interaction, Endocrine System Disorders, Organismal Injury and Abnormalities]
	ATXN7L3B,CMTM8,DDX53,EDIL3,EGFR,EZH2,FENDRR,FMO1,GALNT10,HDAC3,IL17A,ITFG2,LYL1,MEG3,MICB,miR-542-3p (miRNAs w/seed GUGACAG),MT1B,MT1L,NACC1,NACC2,PCNP,PDE6A,PMM2,RILP,RNF38,RUNX1,STPG4,TMEM159,TP53,TRIM25,TRMT1,TTC7A,UCA1,WNT8A,ZCCHC18	16	[Cancer, Cell Morphology, Organismal Injury and Abnormalities]
L-lactic acid	ACRV1,Basal transcriptional machinery,BPTF,CEP95,DDX5,Defb8,GTF2F2,IGDCC3,Il1bos,JUNB,KPNA2,LINC00475,MEIG1,Mucl1/Mucl2,POLG2,POLR2J,POLR2J2/POLR2J3,PRR15L,RDM1,RNA Pol-II-TFIIA-TFIIB-TFIID-TFIIF,RNA polymerase II,Rnr,RNR3,RPP14,RPP38,RPS3,SLC9A8,SNORD118,STK24,TPM4,VTRNA1-1,VTRNA1-2,VTRNA1-3,YWHAG,ZNF83	24	[Cancer, Gastrointestinal Disease, Hepatic System Disease]
	ABHD6,acylglycerol lipase,ADGRA1,ADGRE2,AHNAK,C5AR2,Ca2 ,DNASE1L3,FAM171A1,FLNB,FN1,FPR3,GBE1,GMPR,GPR108,GPR146,GPR19,HSH2D,Immunoglobulin,Jnk,L-lactic acid,MFAP4,N-arachidonylglycine,neopterin,NMT2,NMUR1,NPS,OR10H1,PLA2G2F,SLC26A11,SLC52A2,SMURF2,TGFB1,TPT1,vitamin K1	24	[Cell-To-Cell Signaling and Interaction, Cellular Function and Maintenance, Cellular Movement]
	ACBD7,AFAP1L2,AP1M1,CABYR,CIB3,delta-aminolevulinic acid,DGCR5,EGFR,FANCD2,Fcna,FHIT,FYN,GSK3B,hexanoic acid,HPCAL4,JAK1,L-cystine,LCA5L,LILRA5,MRPS27,neopterin,NT5DC3,NTRK1,NUFIP1,PTPRG,RAB8A,RAP2C,REL,SERAC1,SLC15A1,STYK1,SUV39H2,TDRD1,TNF,TREML1	21	[Antimicrobial Response, Cell Cycle, Connective Tissue Development and Function]
	Asc2,ATRNL1,basic calcium phosphate crystal,C4bp,cannabinol,Ccnjl,CDKN1B,CGREF1,CREB1,Crisp1/Crisp3,DAP,DCLRE1C,DOCK9,FAM32A,FAM50A,FOS,GPHB5,ILK,KCTD4,LRP1,MSK1/2,OMG,PANX3,PCDH11X,PCDH19,PTCD2,Pvr,PXK,RELA,SMAD4,SNW1,SOX12,TAFA1,TRUB1,ZNF366	18	[Cellular Development, Connective Tissue Development and Function, Tissue Development]
Pyruvic acid	BRCA1,BRINP1,C12orf57,E2F1-HDAC-Rb,EED,ESR2,FAM53B,GFY,Gm2694,GPR137C,GPR142,GPR157,GPR162,GPR27,GPR61,GPR62,GPR75,HDAC1,MITF,NRDE2,OAZ2,PAX3,PIF1,pyruvic acid,RB1,REV1,Rpl36,SLC35D1,TMEM50A,TMEM50B,TP53,TRIM25,TRIP4,ZNF516,ZNF609	26	[Cell Cycle, Cell Death and Survival, Connective Tissue Development and Function]
Succinic acid	Akt,E2F2,ERK,ERK1/2,F11,FAIM,FAT1,FZD2,GPATCH8,GRN,Histone h4,HNRNPR,ID3,Immunoglobulin,Integrin,ITGA2B,KLKB1,MGAT1,NFkB (complex),PDGF BB,PIK3CB,RLF,RNF4,RPL11,SH3BP2,SLC25A39,SLC4A1,succinic acid,TAAR5,TMUB2,TNIP2,Vegf,ZFP62,ZMPSTE24,ZNF436	68	[Cell-To-Cell Signaling and Interaction, Hematological System Development and Function, Organismal Injury and Abnormalities]
	ADGRD1,APP,ASAP3,ATXN7L3,CEP70,CYP4V2,DHRSX,DMAC2,DNAJC27,EGLN3,ESR1,FAM149A,FAM171A2,FAM193A,FAM53A,HMGB4,HNRNPL,Hsp90-Ppard,HSP90AA1,Insulin,KCTD16,MAPK1,MTNR1A,OLFML2A,PPARD,RPS6KL1,RUNDC3A,SLC2A4,SMAP2,TCEA3,TRIM7,UBTF,VIM,YIPF5,ZNF449	35	[Cellular Assembly and Organization, Neurological Disease, Organismal Injury and Abnormalities]
	BTNL9,STAT1	3	[Cellular Development, Cellular Growth and Proliferation, Hematological System Development and Function]
